# Supplementary material for: Erwinia phage Asesino is a nucleus-forming phage that lacks PhuZ
Source: PubMed Central journal article supplement (PMC11724907; doi:10.1038/s41598-024-64095-4), 2025-01-11
Supplement: 41598_2024_64095_MOESM1_ESM.pdf [file 41598_2024_64095_MOESM1_ESM.pdf]

## Supplementary Information

**Table S1.** All phages used in phylogenetic analysis figures. The common name, binomial name, NCBI accession number, and whether the available genome sequence is published as a complete or partial genome are listed. For the officially recognized phages, their binomial names are listed as they are in the ICTV taxonomy browser. For unclassified phages, their unofficial classification as listed in the NCBI taxonomy browser was used to fill in this information, if available, and marked with an asterisk in this table.

| Phage Name                           | Binomial Classification (if available) | Genome Accession | Sequence Completeness |
|--------------------------------------|----------------------------------------|------------------|-----------------------|
| <i>Aeromonas</i> phage AerS_266      | unclassified <i>Chaoshanvirus</i> *    | OR496884         | Complete Genome       |
| <i>Aeromonas</i> phage ZPAH34        | <i>Chaoshanvirus</i> ZPAH34            | NC_071007        | Complete Genome       |
| <i>Aeromonas</i> phage CF8           | unclassified <i>Chaoshanvirus</i> *    | MK774614         | Complete Genome       |
| <i>Aeromonas</i> phage pAEv1810      | <i>Ferozepurvirus</i> pAEv1810         | OL964756         | Complete Genome       |
| <i>Aeromonas</i> phage PS1           | <i>Ferozepurvirus</i> PS1              | MN032614         | Complete Genome       |
| <i>Aeromonas</i> phage D6            | <i>Ludhianavirus</i> D6                | MN131137         | Complete Genome       |
| <i>Aeromonas</i> phage D3            | <i>Ludhianavirus</i> D3                | MN102098         | Complete Genome       |
| <i>Aeromonas</i> phage LAh10         | <i>Ludhianavirus</i> LAh10             | MK838116         | Complete Genome       |
| <i>Serraria</i> phage vB_SmaM-Yubaba | unclassified <i>Petsuvirus</i> *       | ON287375         | Complete Genome       |
| <i>Klebsiella</i> phage N1M2         | <i>Nimduovirus</i> N1M2                | MN642089         | Complete Genome       |
| <i>Pseudomonas</i> phage OBP         | unclassified <i>Petsuvirus</i> *       | JN627160         | Complete Genome       |
| <i>Edwardsiella</i> pEt-SU           | <i>Petsuvirus</i> pEtSU                | NC_048182        | Complete Genome       |
| <i>Erwinia</i> phage AH04            | <i>Meadowvirus</i> AH04                | MZ501267         | Complete Genome       |
| <i>Kosakonia</i> phage Kc263         | <i>Branisovskavirus</i> Kc263          | MZ348422         | Complete Genome       |
| <i>Photobacterium</i> phage PDCC-1   | <i>Aphroditevirus</i> PDCC1            | NC_048821        | Complete Genome       |
| <i>Vibrio</i> phage 2 TSL-2019       | <i>Aphroditevirus</i> av2TSL2019       | NC_048747        | Complete Genome       |
| <i>Vibrio</i> phage USC-1            | <i>Aphroditevirus</i> USC1             | NC_048779        | Complete Genome       |

|                                               |                                    |           |                 |
|-----------------------------------------------|------------------------------------|-----------|-----------------|
| <i>Vibrio</i> phage Aphrodite1                | <i>Aphroditevirus aphrodite1</i>   | NC_042100 | Complete Genome |
| <i>Vibrio</i> phage VP4B                      | <i>Tidunavirus VP4B</i>            | NC_042136 | Partial Genome  |
| <i>Vibrio</i> phage pTD1                      | <i>Tidunavirus pTD1</i>            | NC_041916 | Complete Genome |
| <i>Vibrio</i> phage phiKT1028                 | unclassified <i>Tidunavirus</i> *  | OP123707  | Complete Genome |
| <i>Klebsiella</i> phage Miami                 | <i>Miamivirus miami</i>            | MT701590  | Complete Genome |
| <i>Klebsiella</i> phage phiKp_32              | N/A                                | LC768500  | Complete Genome |
| <i>Erwinia</i> phage<br>vB_EamM_RisingSun     | <i>Risingsunvirus risingsun</i>    | NC_042018 | Complete Genome |
| <i>Pseudomonas</i> phage EL                   | <i>Elvirus EL</i>                  | NC_007623 | Complete Genome |
| <i>Shewanella</i> phage<br>FishSpeaker        | N/A                                | OP589283  | Complete Genome |
| <i>Erwinia</i> phage<br>vB_EamM_Simmy50       | <i>Agricanvirus simmy50</i>        | NC_041974 | Complete Genome |
| <i>Erwinia</i> phage<br>vB_EamM_RAY           | <i>Agricanvirus ray</i>            | NC_041973 | Complete Genome |
| <i>Erwinia</i> phage<br>vB_EamM_Special G     | <i>Agricanvirus specialG</i>       | NC_041975 | Complete Genome |
| <i>Erwinia</i> phage<br>vB_EamM_Desertfox     | <i>Agricanvirus desertfox</i>      | NC_042098 | Complete Genome |
| <i>Erwinia</i> phage<br>vB_EamM_Deimos-Minion | <i>Agricanvirus deimos</i>         | NC_041972 | Complete Genome |
| <i>Erwinia</i> phage Ea35-70                  | <i>Agricanvirus Ea3570</i>         | NC_023557 | Complete Genome |
| <i>Erwinia</i> phage AH06                     | unclassified <i>Agricanvirus</i> * | MZ501268  | Complete Genome |
| <i>Erwinia</i> phage<br>pEa_SNUABM_37         | N/A                                | MW845760  | Complete Genome |
| <i>Salmonella</i> phage<br>vB_SalM_SA002      | N/A                                | MN445183  | Complete Genome |
| <i>Proteus</i> phage 10                       | N/A                                | MT661596  | Complete Genome |
| <i>Escherichia</i> phage<br>vB_EcoM_Goslar    | <i>Goslarvirus goslar</i>          | NC_048170 | Complete Genome |
| <i>Serraria</i> phage Moabite                 | <i>Moabitevirus moabite</i>        | NC_048792 | Complete Genome |

|                                          |                                    |           |                 |
|------------------------------------------|------------------------------------|-----------|-----------------|
| <i>Serraria</i> phage vB_SmaM_2050HW     | <i>Moabitevirus mv2050HW</i>       | NC_048668 | Complete Genome |
| <i>Serraria</i> phage vB_SmaS-Totoro     | unclassified <i>Moabitevirus</i> * | ON287372  | Complete Genome |
| <i>Klebsiella</i> phage KpLz-2_45        | <i>Siatvirus Lz245</i>             | NC_061418 | Complete Genome |
| <i>Klebsiella</i> phage vB_KpM_FBKp24    | <i>Maaswegvirus Kp24</i>           | MW394391  | Complete Genome |
| <i>Erwinia</i> phage vB_Ea277G           | unclassified <i>Iapetusvirus</i> * | OP991903  | Complete Genome |
| <i>Erwinia</i> phage PhiEaH1             | <i>Iapetusvirus EaH1</i>           | NC_023610 | Complete Genome |
| <i>Serraria</i> phage PCH45              | N/A                                | MN334766  | Complete Genome |
| <i>Erwinia</i> phage pEa_SNUABM_54       | N/A                                | MW879341  | Complete Genome |
| <i>Klebsiella</i> phage vB_KvM-Eowyn     | <i>Eowynvirus eowyn</i>            | LR881104  | Complete Genome |
| <i>Pseudomonas</i> phage SL2             | <i>Phikzvirus SL2</i>              | NC_042081 | Complete Genome |
| <i>Pseudomonas</i> phage PA7             | <i>Phikzvirus PA7</i>              | MZ444140  | Complete Genome |
| <i>Pseudomonas</i> phage phiKZ           | <i>Phikzvirus phiKZ</i>            | NC_004629 | Complete Genome |
| <i>Pseudomonas</i> phage PS119XW         | <i>Pawinskivirus PS119XW</i>       | MK599315  | Complete Genome |
| <i>Pseudomonas</i> phage PhiPA3          | <i>Miltoncavirus PhiPA3</i>        | HQ630627  | Complete Genome |
| <i>Pseudomonas</i> phage Phabio          | <i>Phabiovirus phabio</i>          | MF042360  | Complete Genome |
| <i>Pseudomonas</i> phage 201phi2-1       | <i>Serwervirus 201phi21</i>        | EU197055  | Complete Genome |
| <i>Pseudomonas</i> phage D6              | N/A                                | OQ363659  | Complete Genome |
| <i>Pseudomonas</i> phage Psa21           | <i>Tepukevirus Psa21</i>           | MK552327  | Complete Genome |
| <i>Pseudomonas</i> phage Noxifer         | <i>Noxifervirus noxifer</i>        | NC_041994 | Complete Genome |
| <i>Pseudomonas</i> phage pPa_SNUABM_DT01 | N/A                                | MW735835  | Complete Genome |
| <i>Ralstonia</i> phage RSL2              | <i>Chiangmaivirus RSL2</i>         | NC_028950 | Complete Genome |

|                                         |                                     |           |                 |
|-----------------------------------------|-------------------------------------|-----------|-----------------|
| <i>Burkholderia</i> phage FLC6          | unclassified <i>Chiangmaivirus*</i> | LC592711  | Complete Genome |
| <i>Ralstonia</i> phage RSF1             | <i>Chiangmaivirus RSF1</i>          | NC_028899 | Complete Genome |
| <i>Ralstonia</i> phage RP12             | <i>Ripduovirus RP12</i>             | NC_041911 | Complete Genome |
| <i>Burkholderia</i> phage FLC9          | N/A                                 | LC667451  | Complete Genome |
| <i>Xanthomonas</i> phage RTH11          | N/A                                 | OQ790161  | Complete Genome |
| <i>Xanthomonas</i> phage vB_XciM_LucasX | N/A                                 | MW825358  | Complete Genome |
| <i>Xanthomonas</i> phage Xoo-sp14       | N/A                                 | MT939492  | Complete Genome |
| <i>Salmonella</i> phage MET_P1_082_240  | unclassified <i>Seoulvirus*</i>     | OQ383623  | Complete Genome |
| <i>Salmonella</i> phage SPN3US          | <i>Seoulvirus SPN3US</i>            | NC_027402 | Complete Genome |
| <i>Proteus</i> phage 7                  | <i>Seoulvirus SPN3US*</i>           | MT679221  | Complete Genome |
| <i>Enterobacteria</i> phage SEGD1       | <i>Seoulvirus SPN3US*</i>           | KU726251  | Complete Genome |
| <i>Salmonella</i> phage SaP7            | <i>Seoulvirus SPN3US*</i>           | OM456492  | Complete Genome |
| <i>Escherichia</i> phage vB_EcoM_Lh1B   | unclassified <i>Seoulvirus*</i>     | OK428535  | Complete Genome |
| <i>Escherichia</i> phage vB_EcoM_EC001  | <i>Seoulvirus SPN3US*</i>           | MN445185  | Complete Genome |
| <i>Salmonella</i> phage JN03            | unclassified <i>Seoulvirus*</i>     | MT799840  | Complete Genome |
| <i>Salmonella</i> phage SPAsTU          | unclassified <i>Seoulvirus*</i>     | MH221129  | Complete Genome |
| <i>Salmonella</i> phage STsAS           | unclassified <i>Seoulvirus*</i>     | MH221128  | Complete Genome |
| <i>Erwinia</i> phage pEa_SNUABM_29      | unclassified <i>Seoulvirus*</i>     | MW812339  | Complete Genome |
| <i>Erwinia</i> phage phiEaH2            | <i>Erskinevirus EaH2</i>            | NC_019929 | Complete Genome |
| <i>Erwinia</i> phage vB_EamM_Stratton   | <i>Erskinevirus EaH2*</i>           | KX397373  | Complete Genome |
| <i>Erwinia</i> phage vB_EamM_Asesino    | <i>Erskinevirus asesino</i>         | NC_031107 | Complete Genome |

|                                            |                                       |           |                 |
|--------------------------------------------|---------------------------------------|-----------|-----------------|
| <i>Erwinia</i> phage vB_EamM_Huxley        | <i>Machinavirus machina</i> *         | NC_031127 | Complete Genome |
| <i>Erwinia</i> phage vB_EamM_Parshik       | unclassified <i>Machinavirus</i> *    | KX397371  | Complete Genome |
| <i>Erwinia</i> phage Machina               | <i>Machinavirus machina</i>           | NC_042056 | Complete Genome |
| <i>Salmonella</i> phage pSal-SNUABM-04     | unclassified <i>Machinavirus</i> *    | MT710307  | Complete Genome |
| <i>Erwinia</i> phage pEa_SNUABM_42         | unclassified <i>Machinavirus</i> *    | MW812340  | Complete Genome |
| <i>Erwinia</i> phage pEa_SNUABM_43         | unclassified <i>Machinavirus</i> *    | MW384823  | Complete Genome |
| <i>Erwinia</i> phage pEa_SNUABM_10         | unclassified <i>Machinavirus</i> *    | MW812342  | Complete Genome |
| <i>Erwinia</i> phage pEa_SNUABM_6          | unclassified <i>Machinavirus</i> *    | MW812343  | Complete Genome |
| <i>Erwinia</i> phage vB_EamM_ChrisDB       | unclassified <i>Machinavirus</i> *    | NC_031126 | Complete Genome |
| <i>Erwinia</i> phage pEa_SNUABM_9          | unclassified <i>Machinavirus</i> *    | MW812341  | Complete Genome |
| <i>Erwinia</i> phage pEa_SNUABM_4          | unclassified <i>Machinavirus</i> *    | MW812338  | Complete Genome |
| <i>Erwinia</i> phage pEa_SNUABM_8          | unclassified <i>Machinavirus</i> *    | MW760841  | Complete Genome |
| <i>Erwinia</i> phage vB_EamM_Caitlin       | unclassified <i>Machinavirus</i> *    | NC_031120 | Complete Genome |
| <i>Erwinia</i> phage Wellington            | <i>Wellingtonvirus wellington</i>     | NC_048016 | Complete Genome |
| <i>Erwinia</i> phage vB_EamM_Kwan          | <i>Wellingtonvirus wellington</i> *   | NC_031010 | Complete Genome |
| <i>Erwinia</i> phage pEa_SNUABM_11         | unclassified <i>Wellingtonvirus</i> * | MW845758  | Complete Genome |
| <i>Erwinia</i> phage Derbicus              | <i>Derbicusvirus derbicus</i>         | NC_048173 | Complete Genome |
| <i>Erwinia</i> phage vB_EamM_EarlPhillipIV | <i>Derbicusvirus derbicus</i> *       | NC_031007 | Complete Genome |
| <i>Erwinia</i> phage pEa_SNUABM_38         | unclassified <i>Derbicusvirus</i> *   | MW845759  | Complete Genome |
| <i>Cronobacter</i> phage CR5               | unclassified <i>Derbicusvirus</i> *   | NC_021531 | Complete Genome |
| <i>Erwinia</i> phage vB_EamM_Phobos        | unclassified <i>Derbicusvirus</i> *   | NC_031043 | Complete Genome |

|                                          |                             |           |                 |
|------------------------------------------|-----------------------------|-----------|-----------------|
| <i>Vibrio</i> phage pVa-21               | N/A                         | KY499642  | Complete Genome |
| <i>Bacillus</i> phage vB_BspM_AgentSmith | N/A                         | MW749006  | Complete Genome |
| <i>Vibrio</i> phage JM-2012              | N/A                         | NC_017975 | Complete Genome |
| <i>Vibrio</i> phage vB_VpaM_sm033        | N/A                         | OV032902  | Complete Genome |
| <i>Vibrio</i> phage vB_pir03             | N/A                         | MT811961  | Complete Genome |
| <i>Vibrio</i> phage BONAISHI             | N/A                         | MH595538  | Complete Genome |
| <i>Vibrio</i> phage vB_VmeM-Yong XC31    | N/A                         | MK308674  | Complete Genome |
| <i>Staphylococcus</i> phage SPbeta-like  | N/A                         | NC_029119 | Complete Genome |
| <i>Bacillus</i> phage SPBc2              | <i>Spbetavirus SPbeta</i>   | NC_001884 | Complete Genome |
| <i>Brevibacillus</i> phage Sundance      | N/A                         | NC_028749 | Complete Genome |
| <i>Geobacillus</i> phage E3              | N/A                         | NC_029073 | Complete Genome |
| <i>Clostridium</i> phage c-st            | N/A                         | NC_007581 | Complete Genome |
| <i>Bacillus</i> phage G                  | <i>Donellivirus gee</i>     | NC_023719 | Complete Genome |
| <i>Bacillus</i> phage PBS1               | <i>Takahashivirus PBS1</i>  | NC_043027 | Complete Genome |
| <i>Bacillus</i> phage AR9                | <i>Takahashivirus PBS1*</i> | NC_031039 | Complete Genome |
| <i>Staphylococcus</i> phage PALS_2       | N/A                         | MN091626  | Complete Genome |
| <i>Yersinia</i> phage phiR1-37           | N/A                         | NC_016163 | Complete Genome |

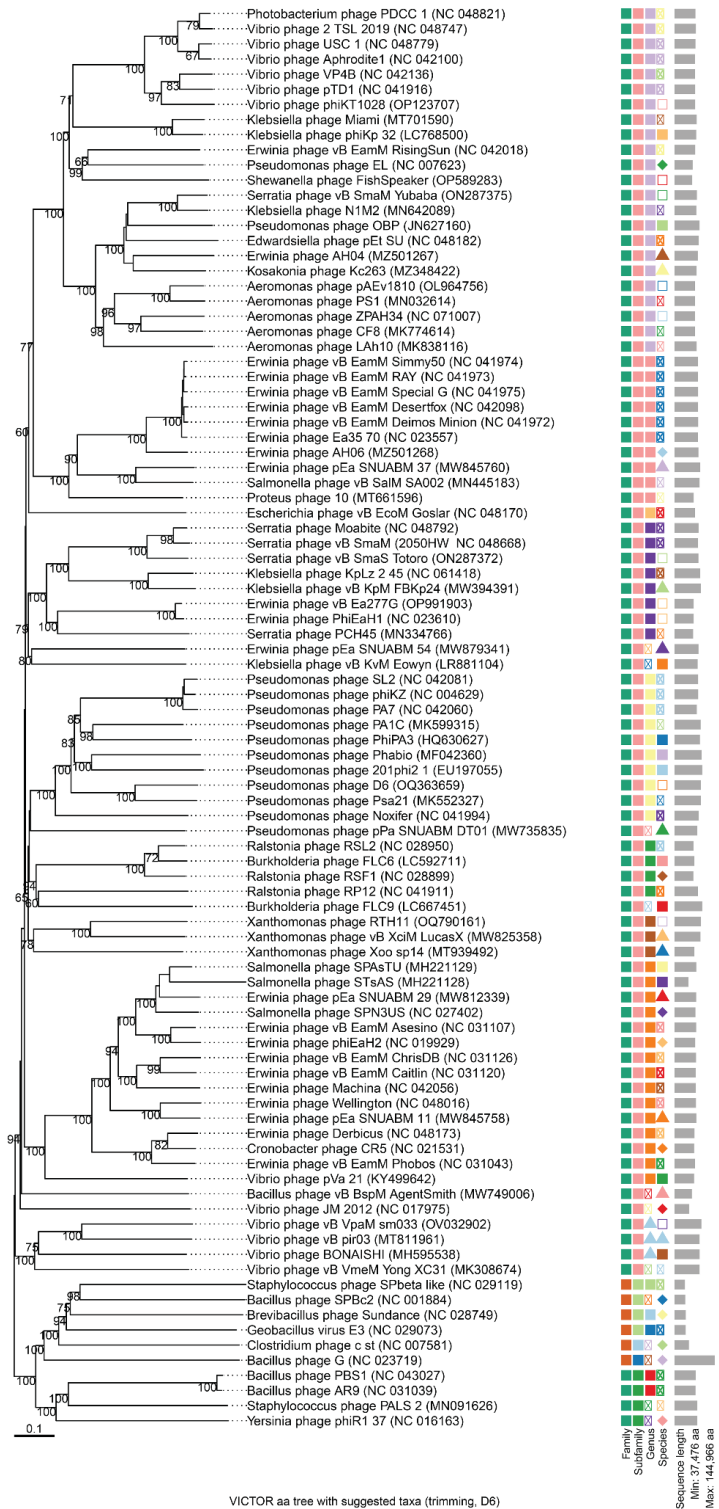

**Figure S1. VICTOR Genome Phylogeny Results.** Original data from VICTOR<sup>45</sup> showing predicted family, subfamily, genus, and species assignments. As many of these phages are unclassified, we use the tentative genus-level taxonomy provided here to annotate Figure 1. Note: VICTOR-predicted genus assignments do not always agree with accepted taxonomy and are simply used here for color-coding divergent clades of chimalliviruses to improve readability, not for proposing real taxonomic groups.

Tree scale: 0.1

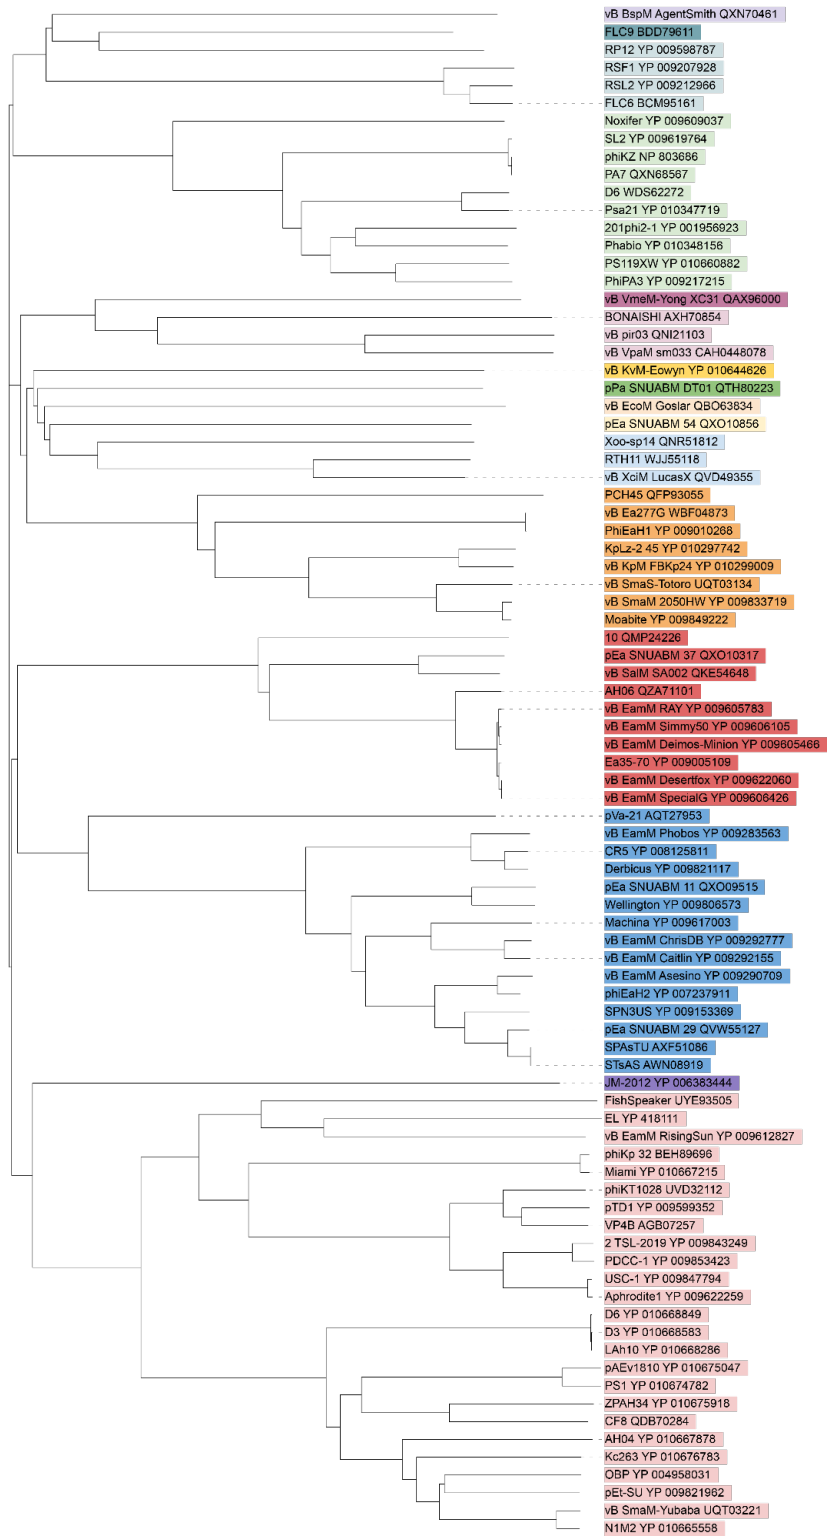

**Figure S2. Major Capsid Protein Tree.** The same clades of chimalliviruses are seen in a phylogenetic tree made using the major capsid protein multiple sequence alignment as in the whole-genome phylogenetic analysis (Figure 1A). The clades are color-coded to match Figure 1A.
